# Supplementary material for: Rainfall patterns after fire differentially affect the recruitment of three Mediterranean shrubs
Source: Copernicus journal article supplement (doi:10.5194/bg-8-3721-2011), 2011-12-19
Supplement: Supplementary file 1 [file bg-8-3721-2011-supplement.pdf]

1 Supplementary Material 1. Seedling emergence and recruitment (Ind. m<sup>-2</sup>) during the first  
 2 three years after fire (YAF1 to YAF3) in a *Cistus-Erica* shrubland in Central Spain, burned  
 3 during three consecutive years (B1 to B3). At each year-season, 3 plots were burned, for a  
 4 total of 18 plots. Monitoring after fire in B3 burns could only be done in the first two years  
 5 after fire (na=not available).

| <i>Cistus ladanifer</i> |        |      |           |      |      |             |      |      |
|-------------------------|--------|------|-----------|------|------|-------------|------|------|
| Year                    | Season | Plot | Emergence |      |      | Recruitment |      |      |
|                         |        |      | YAF1      | YAF2 | YAF3 | YAF1        | YAF2 | YAF3 |
| B1                      | ES     | 1    | 89.2      | 0.0  | 0.0  | 30.0        | 0.0  | 0.0  |
|                         |        | 2    | 88.0      | 0.4  | 0.0  | 31.8        | 0.0  | 0.0  |
|                         |        | 3    | 88.8      | 0.0  | 0.0  | 28.4        | 0.0  | 0.0  |
|                         | LS     | 1    | 105.2     | 0.0  | 0.0  | 29.0        | 0.0  | 0.0  |
|                         |        | 2    | 92.2      | 0.0  | 0.0  | 28.2        | 0.0  | 0.0  |
|                         |        | 3    | 86.6      | 0.2  | 0.0  | 36.6        | 0.0  | 0.0  |
| B2                      | ES     | 1    | 36.4      | 3.6  | 1.8  | 10.2        | 1.0  | 0.0  |
|                         |        | 2    | 101.4     | 9.4  | 5.8  | 33.6        | 0.4  | 0.4  |
|                         |        | 3    | 22.4      | 1.2  | 0.4  | 8.0         | 1.4  | 0.0  |
|                         | LS     | 1    | 29.4      | 36.3 | 3.8  | 6.4         | 3.6  | 0.0  |
|                         |        | 2    | 73.0      | 35.6 | 15.4 | 18.6        | 0.4  | 0.2  |
|                         |        | 3    | 109.3     | 26.4 | 6.9  | 28.0        | 0.0  | 0.0  |
| B3                      | ES     | 1    | 59.4      | 0.8  | na   | 16.4        | 0.0  | na   |
|                         |        | 2    | 63.8      | 3.6  | na   | 12.6        | 1.2  | na   |
|                         |        | 3    | 85.6      | 1.4  | na   | 27.6        | 0.0  | na   |
|                         | LS     | 1    | 220.4     | 32.8 | na   | 42.4        | 3.4  | na   |
|                         |        | 2    | 181.2     | 29.0 | na   | 62.6        | 0.0  | na   |
|                         |        | 3    | 126.2     | 23.2 | na   | 28.8        | 0.0  | na   |
| <i>Erica umbellata</i>  |        |      |           |      |      |             |      |      |
| B1                      | ES     | 1    | 88.8      | 0.0  | 0.0  | 13.4        | 0.0  | 0.0  |
|                         |        | 2    | 345.6     | 0.0  | 0.0  | 46.4        | 0.0  | 0.0  |
|                         |        | 3    | 35.0      | 0.0  | 0.0  | 1.4         | 0.0  | 0.0  |
|                         | LS     | 1    | 181.2     | 0.2  | 0.0  | 9.4         | 0.0  | 0.0  |
|                         |        | 2    | 6.4       | 0.0  | 0.0  | 2.2         | 0.0  | 0.0  |
|                         |        | 3    | 56.0      | 0.0  | 0.0  | 0.8         | 0.0  | 0.0  |
| B2                      | ES     | 1    | 1.6       | 1.2  | 2.4  | 0.4         | 0.0  | 0.6  |
|                         |        | 2    | 15.6      | 6.4  | 7.6  | 0.0         | 0.0  | 0.2  |
|                         |        | 3    | 0.4       | 0.8  | 2.2  | 0.2         | 0.0  | 0.4  |
|                         | LS     | 1    | 0.4       | 18.8 | 1.0  | 0.0         | 0.0  | 0.0  |
|                         |        | 2    | 0.2       | 16.4 | 8.6  | 0.0         | 0.0  | 2.4  |
|                         |        | 3    | 0.2       | 2.6  | 1.2  | 0.0         | 0.0  | 0.0  |
| B3                      | ES     | 1    | 15.0      | 37.6 | na   | 0.8         | 28.0 | na   |
|                         |        | 2    | 13.4      | 20.6 | na   | 0.6         | 12.8 | na   |
|                         |        | 3    | 7.8       | 0.0  | na   | 0.2         | 0.0  | na   |
|                         | LS     | 1    | 18.0      | 16.4 | na   | 0.4         | 2.6  | na   |
|                         |        | 2    | 5.2       | 5.6  | na   | 0.0         | 0.0  | na   |
|                         |        | 3    | 7.4       | 5.8  | na   | 0.2         | 1.2  | na   |

| <i>Rosmarinus officinalis</i> |    |   |      |     |     |      |     |     |
|-------------------------------|----|---|------|-----|-----|------|-----|-----|
| 1                             | ES | 1 | 5.4  | 0.0 | 0.0 | 3.0  | 0.0 | 0.0 |
|                               |    | 2 | 16.0 | 0.0 | 0.0 | 10.0 | 0.0 | 0.0 |
|                               |    | 3 | 13.2 | 0.0 | 0.0 | 8.2  | 0.0 | 0.0 |
|                               | LS | 1 | 7.2  | 0.0 | 0.0 | 4.0  | 0.0 | 0.0 |
|                               |    | 2 | 30.0 | 0.0 | 0.0 | 12.4 | 0.0 | 0.0 |
|                               |    | 3 | 12.6 | 0.0 | 0.0 | 7.4  | 0.0 | 0.0 |
| 2                             | ES | 1 | 11.2 | 0.4 | 0.0 | 7.8  | 0.0 | 0.0 |
|                               |    | 2 | 1.0  | 0.4 | 0.0 | 0.6  | 0.0 | 0.0 |
|                               |    | 3 | 5.2  | 1.2 | 0.2 | 3.2  | 0.2 | 0.2 |
|                               | LS | 1 | 2.6  | 2.0 | 0.0 | 1.0  | 0.2 | 0.0 |
|                               |    | 2 | 8.0  | 2.0 | 0.6 | 4.4  | 0.4 | 0.4 |
|                               |    | 3 | 9.6  | 1.6 | 0.2 | 6.2  | 0.0 | 0.0 |
| 3                             | ES | 1 | 10.8 | 0.0 | na  | 5.4  | 0.0 | na  |
|                               |    | 2 | 20.2 | 0.0 | na  | 9.2  | 0.0 | na  |
|                               |    | 3 | 14.4 | 0.2 | na  | 8.2  | 0.0 | na  |
|                               | LS | 1 | 11.2 | 0.0 | na  | 4.6  | 0.0 | na  |
|                               |    | 2 | 13.2 | 0.2 | na  | 6.4  | 0.2 | na  |
|                               |    | 3 | 26.8 | 0.8 | na  | 11.4 | 0.0 | na  |

1

2

3
